# Supplementary material
Source: ML conference proceedings conference paper supplement (https://proceedings.mlr.press/v48/achim16.html)
Supplement: Supplementary file [file achim16-supp.pdf]

## A Appendix

### A.1 Experiments

The number of variables and clauses in each model counting problem are given in Table 2.

Table 2. Number of variables and clauses in each model counting problem.

| INSTANCE   | VARIABLES | CLAUSES |
|------------|-----------|---------|
| LANG12     | 576       | 13584   |
| LANG15     | 1024      | 32320   |
| LANG16     | 1024      | 32320   |
| LANG19     | 1444      | 54226   |
| LANG20     | 1600      | 63280   |
| LANG23     | 2116      | 96370   |
| LANG24     | 2304      | 109536  |
| LANG27     | 2916      | 156114  |
| LANG28     | 3136      | 174160  |
| LS8        | 301       | 1603    |
| LS9        | 456       | 2864    |
| LS10       | 657       | 4761    |
| LS11       | 910       | 7480    |
| LS12       | 1221      | 11231   |
| LS13       | 1596      | 16248   |
| LS14       | 2041      | 22789   |
| LS15       | 2562      | 31136   |
| 20RDR45    | 190       | 20349   |
| 23RDR45    | 253       | 42504   |
| 2BITMAX6   | 252       | 766     |
| 9SYMMML    | 2604      | 36994   |
| APEX75     | 1983      | 15358   |
| FCLQ18     | 603       | 23312   |
| FCLQ20     | 730       | 33662   |
| VDAGRRCWS9 | 6498      | 130997  |

### A.2 Proofs

*Proof of Theorem 1.* We closely follow the line of reasoning used in the proof of Theorem 3 of Ermon et al. (2014), which was for the specific case short XORs being the hash family. That line of reasoning can be distilled down to three main steps starting with a set  $S \subseteq \{0, 1\}^n$ :

1. Fix an arbitrary  $x \in S$  and, for any  $w \in [n]$ , let  $y_w$  be an arbitrary element of  $S$  at Hamming distance  $w$  from  $x$ . Then define a quantity of interest based on the clash probability:

$$\frac{1}{q-1} \sum_{w=1}^n h(w|x) (\Pr[h(x) = h(y_w)])^m \quad (4)$$

where  $h(w|x)$  denotes the number of elements of the set  $S$  at distance  $w$  from  $x$ .

2. Note that  $h(w|x)$  is difficult to analyze. To circumvent this issue, observe that for the case of short XORs,

the clash probability  $\Pr[h(x) = h(y_w)]$  is a non-increasing function of  $w$ .

3. Using the above observation, upper bound the quantity in Eq. (4) by “squeezing” as many  $y$ ’s at small distances  $w$  as possible, until the total number is  $|S|$ :

$$\frac{1}{q-1} \sum_{w=1}^{w^*} \binom{n}{w} (\Pr[h(x) = h(y_w)])^m \quad (5)$$

We describe how these three steps can be modified to work with functions  $f$  other than short XORs.

For step 1, instead of computing the clash probability for a particular hash family, we simply use Lemma 1 and replace  $\Pr[h(x) = h(y_w)]$  with  $1 - \text{NS}'_w(h)$ , which, by Proposition 2, is precisely  $1 - \text{NS}'_w(f)$ .

Next, for step 2, rather than relying on monotonicity of the clash probability,<sup>1</sup> we define an ordering  $\tau$  over  $[n]$  under which  $\text{NS}'_{\tau(w)}(f)$  is non-increasing. Such an ordering must clearly exist. It is, in fact, often very close to the identity permutation.

Finally, for step 3, we use the  $\tau$  ordering (rather than the identity ordering) and “squeeze” as many  $y$ s at distances  $w$  but *under this ordering* (rather than smallest-distance-first) as possible, until the total number is  $|S|$ . This yields:

$$\frac{1}{q-1} \sum_{w=1}^{w^*} \binom{n}{\tau(w)} (1 - \text{NS}'_{\tau(w)}(f))^m \quad (6)$$

The rest of the argument follows precisely that in the proof of Theorem 3 of Ermon et al. (2014).  $\square$

*Proof of Proposition 3.* For  $j, k \in [n]$ , it will help to define  $p(k, n, j)$  as:

$$p(k, n, j) = \frac{\sum_{\ell=1}^{\min(k,j)} \binom{j}{\ell} \binom{n-j}{k-\ell}}{\binom{n}{k}} \quad (7)$$

This is the probability that if one chooses  $k$  balls uniformly out of  $n$  balls, then an odd number of balls are among some subset of  $j$  “special” balls.

Following ODonnell (2003), Proposition 2.3.1, we can write:

$$\text{NS}'_w(f) = \frac{1}{2} - \frac{1}{2} \sum_{T \subseteq [n]} \mathbf{E}[x_T y_T] \hat{f}(T)^2$$

<sup>1</sup>Fixed distance clash probabilities behave very closely to the provably monotone model where each bit is flipped independently. However, they aren’t always strictly monotone in the fixed distance model.

where  $\hat{f}(T)$  are Fourier coefficients of  $f$ ,  $x_T y_T = \prod_{i \in T} x_i y_i$ , and the expectation is taken over  $x$  chosen uniformly from  $\{-1, 1\}^n$  and  $y$  uniformly from  $N_w(x)$ . The only difference from [ODonnell \(2003\)](#) is in the distribution of  $y$ , which is now taken from the fixed-distance model rather than flipping each bit of  $x$  independently. Observing that  $x_T y_T$  is really only a function of the Hamming distance between  $x$  and  $y$  within the index set defined by  $T$ , we can set  $x = 1^n$  without loss of generality. The resulting term,  $\mathbf{E}[y_T]$ , is determined by how often  $y$  has an *odd* number of  $-1$  values in the bits belonging to  $T$ , which is precisely  $p(w, n, |T|)$ .

Specifically,  $\mathbf{E}[x_T y_T] = 1 - 2p(w, n, |T|)$ . Further, when  $T \setminus \text{sup}(f)$  is non-empty (here  $\text{sup}(f)$  refers to the support of the function  $f$ ), i.e.,  $T$  contains a bit that is not in the support of  $f$ , then  $\hat{f}(T) = 0$ . Thus we have:

$$\begin{aligned} \text{NS}'_w(f) &= \frac{1}{2} - \frac{1}{2} \sum_{T \subseteq \text{sup}(f)} (1 - 2p(w, n, |T|)) \hat{f}(T)^2 \\ &= \sum_{T \subseteq \text{sup}(f)} p(w, n, |T|) \hat{f}(T)^2 \end{aligned}$$

where the last equality follows from Parseval's identity which states that for any boolean function  $f$ ,  $\sum_{T \subseteq \text{sup}(f)} \hat{f}(T)^2 = 1$ . This proves the first part of the claim.

As further insight, we consider the case where  $f$  is  $\text{XOR}_j$ . Then the only non-zero Fourier coefficient is the one with  $T = \text{sup}(f)$ , and this coefficient is 1, yielding  $\text{NS}'_w(\text{XOR}_j) = p(w, n, j)$ .

For the second part of the claim, we begin with some shorthand:  $q(w) \equiv \binom{n}{w-1} \text{NS}'_{w-1}(h)$ , where  $q$  is defined over  $w = 1, \dots, n+1$ . This offset is designed to simplify the application of the Vandermonde inverse. Note that our goal is to compute the  $\text{NS}'_w(h)$ 's for  $w = 0, \dots, n$ , which we can easily recover from the  $q(w)$ 's.

Using this notation, we can recover  $n+1$  evaluations of a polynomial in  $\epsilon$  whose coefficients are the  $q(w)$ 's as follows:

$$\begin{aligned} \text{NS}_\epsilon(h) &= \sum_{w=0}^n \binom{n}{w} \epsilon^w (1-\epsilon)^{n-w} \text{NS}'_w(h) \\ &= (1-\epsilon)^n \sum_{w=1}^{n+1} (\epsilon/(1-\epsilon))^{w-1} q(w) \end{aligned}$$

One can evaluate this polynomial at  $\epsilon_1, \dots, \epsilon_{n+1}$  evenly spaced between 0 and  $1/2$ . Defining  $\vec{\epsilon} = [\epsilon_1, \dots, \epsilon_{n+1}]$ , and  $\alpha_i = \epsilon_i/(1-\epsilon_i)$ , rewriting the above in matrix form we have

$$\vec{\text{NS}}'_\epsilon = \text{diag}((\vec{1} - \vec{\epsilon})^n) V_{\vec{\alpha}} \vec{q}(w) \quad (8)$$

where  $V_{\vec{\alpha}}$  is the classical form of the Vandermonde matrix with parameters  $\vec{\alpha}$ , whose inverse  $B$  can be computed in closed-form. Using the closed-form Vandermonde inverse  $[b_{ij}]$  we have

$$b_{ij} = (-1)^{j-1} \frac{\prod_{\substack{S \subseteq [n+1] \\ |S|=n+1-j \\ i \notin S}} \prod_{s \in S} \alpha_s}{\alpha_i \prod_{\substack{m=1 \\ m \neq i}}^{n+1} (\alpha_m - \alpha_i)}$$

and use that to solve for  $\vec{q}(w)$  in (8), to calculate

$$q(w) = \frac{\epsilon_w}{(1-\epsilon_w)^n} \sum_{i=1}^{n+1} b_{iw} \text{NS}_{\epsilon_i}(h)$$

as desired. Finally,  $\text{NS}'_w(f) = q(w+1)/\binom{n}{w}$ .  $\square$
